1 **Genetic models suggest single and multiple origins of dihydrofolate reductase**  
2 **mutations in *Plasmodium vivax***

3  
4  
5 Ayaz Shaukat<sup>a, ‡</sup>, Qasim Ali<sup>b, ‡</sup>, Lucy Raud<sup>e, ‡</sup>, Abdul Wahab<sup>c</sup>, Taj Ali Khan<sup>c</sup>, Imran Rashid<sup>f</sup>,  
6 Muhammad Rashid<sup>d</sup>, Mubashir Hussain<sup>c</sup>, Mushtaq A. Saleem<sup>a</sup>, Neil D. Sargison<sup>e</sup>, Umer  
7 Chaudhry<sup>e, § \*</sup>

8  
9 <sup>a</sup> *University of Central Punjab, Lahore, Pakistan*

10 <sup>b</sup> *Gomal University, Dera Ismail Khan, Pakistan*

11 <sup>c</sup> *Kohat University of Science and Technology, Pakistan*

12 <sup>d</sup> *PCMD, University of Karachi, Pakistan*

13 <sup>e</sup> *University of Edinburgh, United Kingdom*

14 <sup>f</sup> *University of Veterinary and Animal Sciences, Lahore, Punjab, Pakistan*

15  
16  
17 ‡ Contributed equally

18  
19 \*Corresponding author:

20 Umer Chaudhry, Department of Epidemiology and Public Health, School of Veterinary Medicine,  
21 University of Surrey, UK. Email: [u.chaudhry@surrey.ac.uk](mailto:u.chaudhry@surrey.ac.uk)

22  
23 § Current address: Department of Veterinary Epidemiology and Public Health, School of  
24 Veterinary Medicine, University of Surrey, UK

37 **Abstract**

38

39 Pyrimethamine was first introduced for the treatment of malaria in Asia and Africa during the  
40 early 1980s, replacing chloroquine, and has become the first line of drugs in many countries. In  
41 recent years, development of pyrimethamine resistance in *Plasmodium vivax* has become a barrier  
42 to effective malaria control strategies. Here, we describe the use of meta-barcoded deep amplicon  
43 sequencing technology to assess the evolutionary origin of pyrimethamine resistance by analysing  
44 the flanking region of dihydrofolate reductase (*dhfr*) locus. The genetic modelling suggests that  
45 58R and 173L single mutants and 58R/117N double mutants are present on a single lineage;  
46 suggesting a single origin of these mutations. The triple mutants (57L/58R/117N, 58R/61M/117N  
47 and 58R/117N/173L) share the lineage of 58R/117N, suggesting a common origin. In contrast,  
48 the 117N mutant is present on two separate lineages suggesting that there are multiple origins of  
49 this mutation. We characterised the allele frequency of the *P. vivax dhfr* locus. Our results support  
50 the view that the single mutation of 117N and double mutations of 58R/117N arise commonly,  
51 whereas the single mutation of 173L and triple mutations of 57L/58R/117N, 58R/61M/117N and  
52 58R/117N/173L are less common. Our work will help to inform mitigation strategies for  
53 pyrimethamine resistance in *P. vivax*.

54

55 **Keywords:** Pyrimethamine, *Plasmodium vivax*, meta-barcoded deep amplicon sequencing.

56

57

58

59

60

61

62

63

64

## 65 **1. Introduction**

66 The estimated 228 million cases of malaria and 405,000 deaths in 2018 represent a huge global  
67 public health burden (Poostchi et al., 2018). Sustainable malaria prevention requires reliable  
68 surveillance of drug resistance (Ding et al., 2013). With increasing reports of the pyrimethamine  
69 resistance-associated mutations in *Plasmodium vivax*, it is important to consider effective  
70 prevention and control strategies; while reducing the risk of further development of resistance  
71 mutations (Petersen et al., 2011; Shaukat et al., 2019). Pyrimethamine inhibits dihydrofolate  
72 reductase (*dhfr*) enzymes of *P. vivax*, thereby blocking pyrimidine biosynthesis, leading to  
73 interruption of DNA synthesis (Eldin de Pécoulas et al., 1998). Single nucleotide polymorphisms  
74 (SNPs) in the *P. vivax dhfr* locus have been associated with pyrimethamine resistance. Resistance-  
75 associated SNPs have been found at codons F57L/I (TTC-TTA/ATA), S58R (AGC-AGA), T61M  
76 (ACG-ATG), S117N/T (AGC-AAC/ACC) and I173L/F (ATT-CTT/TTT) (de Pecoulas et al.,  
77 1998; Lee et al., 2010).

78 Detailed knowledge of pyrimethamine resistance has been demonstrated by highlighting the  
79 origins of *Plasmodium falciparum dhfr* resistance mutations in the endemic regions (Cortese et al.,  
80 2002; Lumb et al., 2009; McCollum et al., 2008; Nair et al., 2003; Nash et al., 2005). There are  
81 few studies examining the evolutionary origins of the mutations in *dhfr* locus causing  
82 pyrimethamine resistance in *P. vivax* (Alam et al., 2007; Hawkins et al., 2008a). Therefore a better  
83 understanding of the evolution of pyrimethamine resistance mutations in *P. vivax* is needed to  
84 inform sustainable control of malaria in endemic regions (Shaukat et al., 2019).

85 We have develop metabarcoded deep amplicon sequencing platforms to investigate the  
86 evolutionary origins of drug resistance mutations in various human and livestock parasites (Ali et  
87 al., 2019; Sargison et al., 2019; Shaukat et al., 2019). Here, we describe the application of this  
88 method to *P. vivax* isolates from Pakistan. Our aims were to explore the evolutionary origins of  
89 *dhfr* locus SNPs conferring pyrimethamine resistance and to investigate the allele frequencies of  
90 pyrimethamine resistance-conferring mutations.

91

## 92 **2. Materials and Methods**

### 93 *2.1. Parasite material, genomic DNA preparation and species identification*

94 Blood samples were collected from symptomatic patients seeking malaria diagnosis, who had  
95 been referred to the Chughtai diagnostic laboratory in the Punjab province of Pakistan. The study  
96 was approved by the Institutional Review Board of the University of Central Punjab, Pakistan  
97 (UCP-30818). The samples were taken during the 'peak malaria season' (April to October)  
98 between 2017 and 2019 by trained paramedical workers under the supervision of local  
99 collaborators. The study included patients of all age groups with malaria symptoms including

100 vomiting, fever, headache, chills, sweats, nausea and fatigue. The blood samples were collected  
101 following the written consent of the patients. 4% Giemsa-stained smears were routinely made  
102 from each sample for examination under oil immersion for the diagnosis of malaria. 50  $\mu$ L  
103 aliquots of blood from malaria positive patients were used for gDNA extraction according to the  
104 protocols described in the TIANamp blood DNA kit (Beijing Biopeony Co. Ltd) and sent to the  
105 Roslin Institute for PCR amplification, Illumina MiSeq run and bioinformatics analysis. A  
106 ‘haemoprobiome’ high-throughput sequencing tool was used to confirm the presence of  
107 *Plasmodium* species described by Wahab et al. (2020). In this study, malaria positive field  
108 samples were examined to identify the species of *Plasmodium* involved in the infection. Overall,  
109 the prevalence of *P. vivax* was 69.8%, *P. falciparum* 29.5% and mixed infection 0.7% (Wahab et  
110 al., 2020).

111

## 112 2.2. PCR amplification and Illumina Mi-Seq run

113 A 468 bp fragment of the *P. vivax dhfr* locus was amplified from the samples identified by  
114 Wahab et al. (2020). The primer sets, adapter/barcoded PCR amplification conditions and  
115 magnetic bead purification were previously described by Shaukat et al. (2019). 10  $\mu$ l of each  
116 barcoded PCR product was combined to make a pooled library. At least six pooled libraries were  
117 run on agarose gel electrophoresis to separate PCR products. *dhfr* products were excised from the  
118 gel using commercial kits (QIAquick Gel Extraction Kit, Qiagen, Germany). 20  $\mu$ l of eluted DNA  
119 was then purified using AMPure XP Magnetic Beads (1X) (Beckman Coulter, Inc.), before being  
120 combined into a single purified DNA pool library. The library was measured with KAPA qPCR  
121 library quantification kit (KAPA Biosystems, USA) and then run on an Illumina MiSeq Sequencer  
122 using a 600-cycle pair-end reagent kit (MiSeq Reagent Kits v2, MS-103-2003) at a concentration  
123 of 15nM with the addition of 15% Phix Control v3 (Illumina, FC-11-2003) previously described  
124 by Shaukat et al. (2019).

125

## 126 2.3. Bioinformatics data handling

127 The post-run processing separates all the sequences by sample via the recognised barcoded  
128 indices and generates FASTQ files. The MiSeq data analysis was performed with a bespoke  
129 pipeline using Mothur v1.39.5 software (Kozich et al., 2013; Schloss et al., 2009) with  
130 modifications in the standard operating procedures of Illumina Mi-Seq in the Command Prompt  
131 pipeline previously described (Shaukat et al., 2019). Briefly, raw paired read-ends were run in the  
132 ‘make.contigs’ command to combine the two sets of reads from each sample. The command  
133 extracts sequences and quality score data from the FASTQ files, creating the complement of the  
134 forward and reverse reads and combined them into contigs. After removing long, or ambiguous

135 sequence reads (>468 bp) using the ‘screen.seqs’ command, the data were aligned with the *P.*  
136 *vivax dhfr* reference sequence library using the ‘align.seqs’ command. Sequences that did not  
137 match with the *P. vivax dhfr* reference sequence library were removed and the ‘summary.seqs’  
138 command. The sequence reads were further run on the ‘screen.seqs’ command to generate the *P.*  
139 *vivax dhfr* FASTQ file. Once the sequence reads were classified as *P. vivax*, a count list of the  
140 consensus sequences of each sample was created using the ‘unique.seqs’ command. The count list  
141 was further used to create FASTQ files of the consensus sequences of each sample using the  
142 ‘split.abund’ command to sort data into groups of rare and abundant based on the cut-off value,  
143 followed by the ‘split.groups’ command. Those samples yielding more than 1000 reads (implying  
144 sufficient gDNA for accurate amplification) were included in the cut-off value.

145

#### 146 2.4. Bioinformatic analysis

147 *P. vivax dhfr* sequences generated from the count list of the consensus sequences were edited  
148 and aligned in Geneious Prime 2020.1 software (Kearse et al., 2012). These consensus sequences  
149 were used for the calculation of the relative allele frequencies of *dhfr* resistance-associated  
150 mutations. To achieve this, *P. vivax dhfr* isolates generated from the count list of the consensus  
151 sequences were first assigned to relevant susceptible or resistance mutations based on known  
152 SNPs at codons F57L/I (TTC-TTA/ATA), S58R (AGC-AGA), T61M (ACG-ATG), S117N/T  
153 (AGC-AAC/ACC) and I173L/F (ATT-CTT/TTT). Allele frequencies were calculated by dividing  
154 the number of sequences reads of each isolate that contained these mutations by the total number  
155 of reads (R Core Team, 2013; package ggplot2).

156 For the genetic diversity analysis, the haplotype diversity ( $H_d$ ), nucleotide diversity ( $\pi$ ), number  
157 of segregating sites ( $S$ ), mutations parameter based on segregating sites ( $S_0$ ) and the mean number  
158 of pairwise differences ( $k$ ) values within the aligned consensus sequences of *P. vivax dhfr* locus  
159 were calculated using the DnaSP 5.10 software package (Librado and Rozas, 2009). For the  
160 analysis of genetic differences, the pairwise fixation index ( $F_{ST}$ ) values between the aligned *P.*  
161 *vivax dhfr* consensus sequences were calculated using Arlequin program v. 3.5.2.2 (Loftus et al.,  
162 1994).

163 For phylogenetic analysis, the aligned *P. vivax dhfr* consensus sequences were imported into  
164 the FaBox 1.5 online tool to collapse all sequences showing 100% base pair similarity after  
165 corrections into a single haplotype (unique sequences generated from millions of MiSeq reads). A  
166 split tree of *dhfr* haplotypes was constructed based on the HKY85 genetic model using the  
167 neighbour-joining method employed in SplitTrees4 software v4.10 (Huson & Bryant, 2006). The  
168 appropriate model of nucleotide substitutions for neighbour-joining analysis was selected by using  
169 the jModeltest 12.2.0 program (Posada, 2008).

170

### 171 3. Results

#### 172 3.1. Allele frequencies of pyrimethamine resistance-associated SNPs

173 A 468 bp fragment of *P. vivax dhfr* locus was successfully amplified from 141 individual  
174 isolates selected from our previous study (Wahab et al., 2020). The relative allele frequencies of  
175 five resistance-associated SNPs [F57L/I (TTC-TTA/ATA), S58R (AGC-AGA), T61M (ACG-  
176 ATG), S117N/T (AGC-AAC/ACC) and I173L/F (ATT-CTT/TTT)] were determined by  
177 metabarcoded deep amplicon sequencing technology. Ninety-nine *P. vivax* isolates were 100%  
178 susceptible based on the *dhfr* locus allele frequencies [F57 (TTC), S58 (AGC), T61 (ACG), S117  
179 (AGC) and I173 (ATT)] (Fig. 1). Pyrimethamine susceptible alleles and resistance-associated  
180 mutations were present in 42 *P. vivax* isolates (Fig. 1, Table 1). Based on the analysis of each  
181 isolate separately, 11 isolates carried between 62.44 and 98.95% susceptible alleles and 1.05 and  
182 37.56% carried resistance mutations [Table 1, Isolate ID (R-1-R-11)], and 31 isolates carried  
183 between 51.98 and 100% resistant-associated mutations and 0 and 48.02% susceptible alleles  
184 [Table 1, Isolate ID (R-12-R-42)]. Based on the analysis of each resistance SNP separately, 117N  
185 (AAC) single mutation was identified in 23 isolates at frequencies between 0.04 and 100%.  
186 Double mutations of 58R/117N (AGA/AAC) were detected in 33 isolates at frequencies between  
187 0.06 and 100%. The 173L (CTT) SNP was identified in 4 isolates at frequencies between 0.99 and  
188 100% (Fig. 1, Table 1). The single pyrimethamine resistance-associated mutation at 58R (AGA)  
189 was identified in 3 isolates at low frequencies between 0.06 and 0.74% (Fig 1, Table 1). Triple  
190 mutations of 57L/58R/117N (TTA/AGA/AAC), 58R/61M/117N (AGA/ATG/AAC) and  
191 58R/117N/173L (AGA/AAC/CTT) were present in 4, 1 and 1 isolates respectively, with very low  
192 frequencies of 0.06% (Fig 1, Table 1).

193

#### 194 3.2. Phylogeny of pyrimethamine resistance-associated SNPs

195 A total of 178 unique *dhfr* haplotypes were generated among 42 *P. vivax* isolates carried  
196 pyrimethamine susceptible and resistance-associated mutations (Supplementary Data S1).  
197 Seventy-four out of 178 haplotypes [F57 (TTC), S58 (AGC), T61 (ACG), S117 (AGC) and I173  
198 (ATT)] were susceptible, and 104 out of 178 haplotypes [58R (AGA), 117N (AAC) and 173N  
199 (AAC)] were resistant. Out of those 104 haplotypes, 54 encoded 58R/117N (AGA/AAC) double  
200 resistance mutations, 40 encoded 117N (AAC), 5 encoded 58R (AGA) and 2 encoded 173L (CTT)  
201 resistance mutations. Three haplotypes encoded the triple resistance mutations of 57L/58R/117N  
202 (TTA/AGA/AAC), 58R/61M/117N (AGA/ATG/AAC) and 58R/117N/173L (AGA/AAC/CTT)  
203 (Supplementary Data S1).

204 A split tree was created to examine the phylogenetic relationship between 104 unique *dhfr*  
205 resistance haplotypes identified among 42 *P. vivax* isolates (Fig. 2). The analysis of the 58R/117N  
206 (AGA/AAC) resistance mutants showed that 54 haplotypes were located in a single lineage (Fig.  
207 2). Three individual haplotypes of the triple mutants [57L/58R/117N (TTA/AGA/AAC),  
208 58R/61M/117N (AGA/ATG/AAC), 58R/117N/173L (AGA/AAC/CTT)] shared the lineage of  
209 58R/117N (AGA/AAC) haplotypes (Fig 2). Analysis of the 117N (AAC) resistance mutant  
210 revealed that 40 haplotypes were located in 2 separate lineages (Fig. 2). Five haplotypes of 58R  
211 (AGA) and 2 haplotypes of 173L (CTT) mutant were found at low frequencies in two separate  
212 lineages (Fig. 2).

213

### 214 3.3. Genetic structure of *dhfr* locus

215 The genetic structure of the *dhfr* locus was assessed individually from 42 *P. vivax* isolates. The  
216 data show a high genetic diversity at both haplotype and nucleotide levels (Table 2), with the  
217 values of haplotype diversity ( $H_d$ ) ranging from 0.111 to 0.923 and nucleotide diversity ( $\pi$ ) from  
218 0.00021 to 0.00598 within individual isolate. The overall values between isolates were 0.769 and  
219 0.00415 for haplotype and nucleotide diversity, respectively. The mean fixation index ( $F_{ST}$ ) values  
220 of the *dhfr* locus were 0.62, indicating low to moderate genetic differentiation within 42 *P. vivax*  
221 isolates. The  $F_{ST}$  values also indicated a low to moderate genetic differentiation, ranging from 0.01  
222 to 0.98 between individual isolate (Fig. 3).

223

## 224 4. Discussion

225 Several studies have explored the origins of pyrimethamine resistance-associated mutations in  
226 *P. falciparum* in different geographical regions. *P. falciparum dhfr* quartet mutants have been  
227 identified with a single genetic origin in Southeast Asian countries (Mita et al., 2009). In contrast,  
228 *P. falciparum dhfr* triple and double mutants have been identified with multiple origins in  
229 Southeast Asia, South America and African countries (Lumb et al., 2009; Mita, 2010).  
230 Understanding the nature of adaptive changes associated with the origin of pyrimethamine  
231 resistance in *P. vivax* is poor (Hawkins et al., 2008b).

232 In the present study, 54 diverse haplotypes of the 58R/117N double mutants were present on a  
233 single lineage, suggesting that there is a single origin of this mutation in *P. vivax* isolates  
234 examined. The triple mutants (57L/58R/117N, 58R/61M/117N and 58R/117N/173L) shared this  
235 lineage, suggesting that these mutations have the same origins. Five haplotypes of 58R and 2  
236 haplotypes of 173L mutants were found at low frequencies in two separate lineages, indicating  
237 single origin. Forty diverse haplotypes of the 117N mutant were present on two separate lineages  
238 suggesting multiple origins of this mutation. These results differ from those of a previous study of

239 the evolutionary origin of *P. vivax dhfr* resistance-conferring mutations (Hawkins et al., 2008b),  
240 which demonstrated that 58R/117N double mutants, 58R/61M/117T triple mutants and  
241 57L/61M/117T/173F, 57I/58R/61M/117T, 57L/58R/61M/117T quadruple mutants had multiple  
242 origins in Thailand, Indonesia, Papua New Guinea and Vanuatu. A level of genetic diversity in *P.*  
243 *vivax*, may confer genetic adaptability (Alam et al., 2007; Hong et al., 2016), enabling the origin  
244 of pyrimethamine resistance mutations. In the present study, we have identified a high level of  
245 allelic polymorphism in *P. vivax* isolates, consistent with the high level of genetic diversity  
246 expected for this parasite. Conversely, a high mutation rate ( $2.5 \times 10^{-9}$ ) was shown in *P.*  
247 *falciparum* in an experiment measuring mutations associated with the origin of pyrimethamine  
248 resistance mutations (Paget-McNicol and Saul, 2001). The effective parasite load may also  
249 influence the origin of pyrimethamine resistance mutations in *P. vivax* (Hastings et al., 2004).

250 The genetic differentiation at the *dhfr* locus amongst the *P. vivax* isolates for the current study  
251 was consistent with human migration between the cities of the Punjab province of Pakistan  
252 playing a role in the spread of pyrimethamine resistance mutations. The spread of resistance  
253 mutations may be influenced by the impact of the antimalarial drug on the gametocytes stage of  
254 *Plasmodium*. It has been demonstrated that pyrimethamine resistance can increase the number of  
255 gametocytes carried by the patient, thereby increasing transmission intensity of resistant parasites  
256 during a mosquito blood meal (Petersen et al., 2011).

257 The present study describes the allele frequencies of pyrimethamine resistance mutations in the  
258 *dhfr* locus of *P. vivax* isolates from the Punjab Province of Pakistan. Our findings are similar to  
259 previous studies from Pakistan, where a 117N single mutant and 58R/117N double mutants were  
260 shown to be highly prevalent, whilst the 57L, 58R and 61M mutants were only detected at low  
261 frequencies and or, in combination with the 117N mutant (Khattak et al., 2013; Raza et al., 2013;  
262 Shaukat et al., 2019; Zakeri et al., 2011). Previous studies have consistently shown that the 117N  
263 single mutant and 58R/117N/T double mutants were present at high frequencies in different  
264 geographical regions, while the 57L, 58R, 61M, and 173L single mutants and 57L/58R/117N,  
265 58R/61M/117N and 58R/117N/173L triple mutants were present at relatively low frequencies  
266 (Auliff et al., 2006; Brega et al., 2004; de Pecoulas et al., 1998; Hastings et al., 2005; Imwong et  
267 al., 2003; Kaur et al., 2006; Kuesap et al., 2011; Lu et al., 2012; Mint Lekweiry et al., 2012;  
268 Ranjitkar et al., 2011; Schunk et al., 2006). Mutations in the *P. vivax dhfr* locus may impart a  
269 fitness cost, whereby the selective advantage acquired by becoming drug-resistant is balanced by  
270 the biological cost arising from the altered function of the mutated protein (Petersen et al., 2011).  
271 The single origins of the common mutants and single origins of the rare mutants shown in the  
272 present study may reflect differences in fitness costs between these mutations (Petersen et al.,  
273 2011).



274 In conclusion, we investigated evidence for multiple and single origins of different SNPs in the  
275 *dhfr* locus of *P. vivax* associated with pyrimethamine resistance. The results show high allele  
276 frequencies associated with 58R/117N and 117N resistance mutations and relatively low  
277 frequencies of other mutations. Understanding the origin of resistance mutations is needed to  
278 develop strategies for prolonging the effectiveness of pyrimethamine drug treatment. From these  
279 findings, better surveillance methods can be established to monitor the dispersion of the  
280 pyrimethamine resistance.

281

## 282 **Acknowledgement**

283 Work at the University of Central Punjab, Pakistan and Kohat University of Science and  
284 Technology Pakistan uses facilities funded by the Higher Education Commission of Pakistan.

285

## 286 **Conflict of interest**

287 None

288

## 289 **Reference**

- 290 Alam, M.T., Agarwal, R., Sharma, Y.D., 2007. Extensive heterozygosity at four microsatellite  
291 loci flanking *Plasmodium vivax* dihydrofolate reductase gene. *Mol. Biochem. Parasitol.*  
292 153, 178-185.
- 293 Ali, Q., Rashid, I., Shabbir, M.Z., Aziz Ul, R., Shahzad, K., Ashraf, K., Sargison, N.D., Chaudhry,  
294 U., 2019. Emergence and the spread of the F200Y benzimidazole resistance mutation in  
295 *Haemonchus contortus* and *Haemonchus placei* from buffalo and cattle. *Vet. Parasitol.*  
296 265, 48-54.
- 297 Auliff, A., Wilson, D.W., Russell, B., Gao, Q., Chen, N., Anh le, N., Maguire, J., Bell, D., O'Neil,  
298 M.T., Cheng, Q., 2006. Amino acid mutations in *Plasmodium vivax* DHFR and DHPS  
299 from several geographical regions and susceptibility to antifolate drugs. *Am. J. Trop. Med.*  
300 *Hyg.* 75, 617-621.
- 301 Brega, S., de Monbrison, F., Severini, C., Udomsangpetch, R., Sutanto, I., Ruckert, P., Peyron, F.,  
302 Picot, S., 2004. Real-time PCR for dihydrofolate reductase gene single-nucleotide  
303 polymorphisms in *Plasmodium vivax* isolates. *Antimicrob. Agents. Chemother.* 48, 2581-  
304 2587.
- 305 Cortese, J.F., Caraballo, A., Contreras, C.E., Plowe, C.V., 2002. Origin and dissemination of  
306 *Plasmodium falciparum* drug-resistance mutations in South America. *J. Infect. Dis.* 186,  
307 999-1006.
- 308 de Pecoulas, P.E., Tahar, R., Ouatas, T., Mazabraud, A., Basco, L.K., 1998. Sequence variations  
309 in the *Plasmodium vivax* dihydrofolate reductase-thymidylate synthase gene and their  
310 relationship with pyrimethamine resistance. *Mol. Biochem. Parasitol.* 92, 265-273.
- 311 Ding, S., Ye, R., Zhang, D., Sun, X., Zhou, H., McCutchan, T.F., Pan, W., 2013. Anti-folate  
312 combination therapies and their effect on the development of drug resistance in  
313 *Plasmodium vivax*. *Scientific reports* 3, 1008.
- 314 Eldin de Pécoulas, P., Basco, L.K., Tahar, R., Ouatas, T., Mazabraud, A., 1998. Analysis of the  
315 *Plasmodium vivax* dihydrofolate reductase-thymidylate synthase gene sequence. *Gene* 211,  
316 177-185.

- 317 Hastings, I.M., Paget-McNicol, S., Saul, A., 2004. Can mutation and selection explain virulence in  
318 human *P. falciparum* infections? *Malar. J.* 3, 2-2.
- 319 Hastings, M.D., Maguire, J.D., Bangs, M.J., Zimmerman, P.A., Reeder, J.C., Baird, J.K., Sibley,  
320 C.H., 2005. Novel *Plasmodium vivax* dhfr alleles from the Indonesian Archipelago and  
321 Papua New Guinea: association with pyrimethamine resistance determined by a  
322 *Saccharomyces cerevisiae* expression system. *Antimicrob. Agents. Chemother.* 49, 733-  
323 740.
- 324 Hawkins, V.N., Auliff, A., Prajapati, S.K., Rungsihirunrat, K., Hapuarachchi, H.C., Maestre, A.,  
325 O'Neil, M.T., Cheng, Q., Joshi, H., Na-Bangchang, K., Sibley, C.H., 2008a. Multiple  
326 origins of resistance-conferring mutations in *Plasmodium vivax* dihydrofolate reductase.  
327 *Malar. J.* 7, 72.
- 328 Hawkins, V.N., Auliff, A., Prajapati, S.K., Rungsihirunrat, K., Hapuarachchi, H.C., Maestre, A.,  
329 O'Neil, M.T., Cheng, Q., Joshi, H., Na-Bangchang, K., Sibley, C.H., 2008b. Multiple  
330 origins of resistance-conferring mutations in *Plasmodium vivax* dihydrofolate reductase.  
331 *Malar. J.* 7, 72.
- 332 Hong, N.V., Delgado-Ratto, C., Thanh, P.V., Van den Eede, P., Guetens, P., Binh, N.T., Phuc,  
333 B.Q., Duong, T.T., Van Geertruyden, J.P., D'Alessandro, U., Erhart, A., Rosanas-Urgell,  
334 A., 2016. Population Genetics of *Plasmodium vivax* in Four Rural Communities in Central  
335 Vietnam. *PLoS neglected tropical diseases* 10, e0004434.
- 336 Imwong, M., Pukrittayakamee, S., Renia, L., Letourneur, F., Charlieu, J.P., Leartsakulpanich, U.,  
337 Looareesuwan, S., White, N.J., Snounou, G., 2003. Novel point mutations in the  
338 dihydrofolate reductase gene of *Plasmodium vivax*: evidence for sequential selection by  
339 drug pressure. *Antimicrob. Agents. Chemother.* 47, 1514-1521.
- 340 Kaur, S., Prajapati, S.K., Kalyanaraman, K., Mohammed, A., Joshi, H., Chauhan, V.S., 2006.  
341 *Plasmodium vivax* dihydrofolate reductase point mutations from the Indian subcontinent.  
342 *Acta. Trop.* 97, 174-180.
- 343 Kearse, M., Moir, R., Wilson, A., Stones-Havas, S., Cheung, M., Sturrock, S., Buxton, S., Cooper,  
344 A., Markowitz, S., Duran, C., Thierer, T., Ashton, B., Meintjes, P., Drummond, A., 2012.  
345 Geneious Basic: an integrated and extendable desktop software platform for the  
346 organization and analysis of sequence data. *Bioinformatics* 28, 1647-1649.
- 347 Khattak, A.A., Venkatesan, M., Khatoon, L., Ouattara, A., Kenefic, L.J., Nadeem, M.F., Nighat,  
348 F., Malik, S.A., Plowe, C.V., 2013. Prevalence and patterns of antifolate and chloroquine  
349 drug resistance markers in *Plasmodium vivax* across Pakistan. *Malar. J.* 12, 1475-2875.
- 350 Kozich, J.J., Westcott, S.L., Baxter, N.T., Highlander, S.K., Schloss, P.D., 2013. Development of  
351 a dual-index sequencing strategy and curation pipeline for analyzing amplicon sequence  
352 data on the MiSeq Illumina sequencing platform. *Appl. Environ. Microbiol.* 79, 5112-  
353 5120.
- 354 Kuesap, J., Rungsihirunrat, K., Thongdee, P., Ruangweerayut, R., Na-Bangchang, K., 2011.  
355 Change in mutation patterns of *Plasmodium vivax* dihydrofolate reductase (Pvdhfr) and  
356 dihydropteroate synthase (Pvdhps) in *P. vivax* isolates from malaria endemic areas of  
357 Thailand. *Mem Inst Oswaldo Cruz* 1, 130-133.
- 358 Lee, W.J., Kim, H.H., Choi, Y.K., Choi, K.M., Kim, M.A., Kim, J.Y., Sattabongkot, J., Sohn, Y.,  
359 Kim, H., Lee, J.K., Park, H.S., Lee, H.W., 2010. Analysis of the dihydrofolate reductase-  
360 thymidylate synthase gene sequences in *Plasmodium vivax* field isolates that failed  
361 chloroquine treatment. *Malar. J.* 9, 1475-2875.
- 362 Librado, P., Rozas, J., 2009. DnaSP v5: a software for comprehensive analysis of DNA  
363 polymorphism data. *Bioinformatics* 25, 1451-1452.
- 364 Loftus, R.T., MacHugh, D.E., Bradley, D.G., Sharp, P.M., Cunningham, P., 1994. Evidence for  
365 two independent domestications of cattle. *Proceedings of the National Academy of  
366 Sciences* 91, 2757-2761.

- 367 Lu, F., Wang, B., Cao, J., Sattabongkot, J., Zhou, H., Zhu, G., Kim, K., Gao, Q., Han, E.T., 2012.  
368 Prevalence of drug resistance-associated gene mutations in *Plasmodium vivax* in Central  
369 China. Korean J. Parasitol. 50, 379-384.
- 370 Lumb, V., Das, M.K., Singh, N., Dev, V., Wajihullah, Sharma, Y.D., 2009. Characteristics of  
371 genetic hitchhiking around dihydrofolate reductase gene associated with pyrimethamine  
372 resistance in *Plasmodium falciparum* isolates from India. Antimicrob. Agents. Chemother.  
373 53, 5173-5180.
- 374 McCollum, A.M., Basco, L.K., Tahar, R., Udhayakumar, V., Escalante, A.A., 2008. Hitchhiking  
375 and selective sweeps of *Plasmodium falciparum* sulfadoxine and pyrimethamine resistance  
376 alleles in a population from central Africa. Antimicrob. Agents. Chemother. 52, 4089-  
377 4097.
- 378 Mint Lekweiry, K., Ould Mohamed Salem Boukhary, A., Gaillard, T., Wurtz, N., Bogueau, H.,  
379 Hafid, J.E., Trape, J.F., Bouchiba, H., Ould Ahmedou Salem, M.S., Pradines, B., Rogier,  
380 C., Basco, L.K., Briolant, S., 2012. Molecular surveillance of drug-resistant *Plasmodium*  
381 *vivax* using pvdhfr, pvdhps and pvmdr1 markers in Nouakchott, Mauritania. J. Antimicrob.  
382 Chemother. 67, 367-374.
- 383 Mita, T., 2010. Origins and spread of pfdhfr mutant alleles in *Plasmodium falciparum*. Acta. Trop.  
384 114, 166-170.
- 385 Mita, T., Tanabe, K., Kita, K., 2009. Spread and evolution of *Plasmodium falciparum* drug  
386 resistance. Parasitol. Int. 58, 201-209.
- 387 Nair, S., Williams, J.T., Brockman, A., Paiphun, L., Mayxay, M., Newton, P.N., Guthmann, J.P.,  
388 Smithuis, F.M., Hien, T.T., White, N.J., Nosten, F., Anderson, T.J., 2003. A selective  
389 sweep driven by pyrimethamine treatment in southeast asian malaria parasites. Mol. Biol.  
390 Evol. 20, 1526-1536.
- 391 Nash, D., Nair, S., Mayxay, M., Newton, P.N., Guthmann, J.P., Nosten, F., Anderson, T.J., 2005.  
392 Selection strength and hitchhiking around two anti-malarial resistance genes. Proceedings.  
393 Biological sciences 272, 1153-1161.
- 394 Paget-McNicol, S., Saul, A., 2001. Mutation rates in the dihydrofolate reductase gene of  
395 *Plasmodium falciparum*. Parasitology 122, 497-505.
- 396 Petersen, I., Eastman, R., Lanzer, M., 2011. Drug-resistant malaria: molecular mechanisms and  
397 implications for public health. FEBS Lett. 585, 1551-1562.
- 398 Poostchi, M., Silamut, K., Maude, R.J., Jaeger, S., Thoma, G., 2018. Image analysis and machine  
399 learning for detecting malaria. Translational research : Journal of Laboratory and Clinical  
400 Medicine 194, 36-55.
- 401 Posada, D., 2008. JModelTest: phylogenetic model averaging. Mol. Biol. Evol. 25, 1253-1256.
- 402 Ranjitkar, S., Schousboe, M.L., Thomsen, T.T., Adhikari, M., Kapel, C.M., Bygbjerg, I.C.,  
403 Alifrangis, M., 2011. Prevalence of molecular markers of anti-malarial drug resistance in  
404 *Plasmodium vivax* and *Plasmodium falciparum* in two districts of Nepal. Malar. J. 10, 75.
- 405 Raza, A., Ghanchi, N.K., Khan, M.S., Beg, M.A., 2013. Prevalence of drug resistance associated  
406 mutations in *Plasmodium vivax* against sulphadoxine-pyrimethamine in southern Pakistan.  
407 Malar. J. 12, 261.
- 408 Sargison, N.D., MacLeay, M., Morrison, A.A., Bartley, D.J., Evans, M., Chaudhry, U., 2019.  
409 Development of amplicon sequencing for the analysis of benzimidazole resistance allele  
410 frequencies in field populations of gastrointestinal nematodes. Int. J. Parasitol. Drugs and  
411 Drug Resistance 10, 92-100.
- 412 Schloss, P.D., Westcott, S.L., Ryabin, T., Hall, J.R., Hartmann, M., Hollister, E.B., Lesniewski,  
413 R.A., Oakley, B.B., Parks, D.H., Robinson, C.J., 2009. Introducing mothur: open-source,  
414 platform-independent, community-supported software for describing and comparing  
415 microbial communities. Appl. Environ. Microbiol. 75, 7537-7541.
- 416 Schunk, M., Kumma, W.P., Miranda, I.B., Osman, M.E., Roewer, S., Alano, A., Loscher, T.,  
417 Bienzle, U., Mockenhaupt, F.P., 2006. High prevalence of drug-resistance mutations in

- 418 Plasmodium falciparum and Plasmodium vivax in southern Ethiopia. Malar. J. 5, 1475-  
419 2875.
- 420 Shaukat, A., Ali, Q., Connelley, T., Khan, M.A.U., Saleem, M.A., Evans, M., Rashid, I., Sargison,  
421 N.D., Chaudhry, U., 2019. Selective sweep and phylogenetic models for the emergence  
422 and spread of pyrimethamine resistance mutations in *Plasmodium vivax*. Infect. Genet.  
423 Evol. 68, 221-230.
- 424 Wahab, A., Shaukat, A., Ali, Q., Hussain, M., Khan, T.A., Khan, M.A.U., Rashid, I., Saleem,  
425 M.A., Evans, M., Sargison, N.D., Chaudhry, U., 2020. A novel metabarcoded 18S  
426 ribosomal DNA sequencing tool for the detection of *Plasmodium* species in malaria  
427 positive patients. Infect. Genet. Evol. 82, 104305.
- 428 Zakeri, S., Afsharipad, M., Ghasemi, F., Raeisi, A., Kakar, Q., Atta, H., Djadid, N.D., 2011.  
429 Plasmodium vivax: prevalence of mutations associated with sulfadoxine-pyrimethamine  
430 resistance in *Plasmodium vivax* clinical isolates from Pakistan. Exp. Parasitol. 127, 167-  
431 172.

### 432 **Figure Legend**

433 **Fig. 1.** Relative allele frequencies of the pyrimethamine resistance-associated mutations in 141  
434 *P.vivax* isolates from the Punjab province of Pakistan. The frequency of resistance and susceptible  
435 alleles was based on their identification using Illumina MiSeq deep amplicon sequencing  
436 technology. Resistant and susceptible alleles are shown in different colours.

437 **Fig. 2.** A split tree was generated from 104 haplotypes identified in *P. vivax dhfr* sequence data  
438 (Supplementary Data S1). The haplotypes were aligned on the MUSCLE tool of the Geneious  
439 v9.0.1 and the tree was constructed with the UPGMA method in the HKY85 model of substitution  
440 in the SplitsTrees4 software. The appropriate model of nucleotide substitutions was selected by  
441 using the jModeltest 13.1.0 program. The circles in the tree represent different mutations in *dhfr*  
442 locus containing different colours.

443 **Fig. 3.** Fixation index ( $F_{ST}$ ) values based on genotyping of 42 *P. vivax* isolates using *dhfr*  
444 sequence data.

445

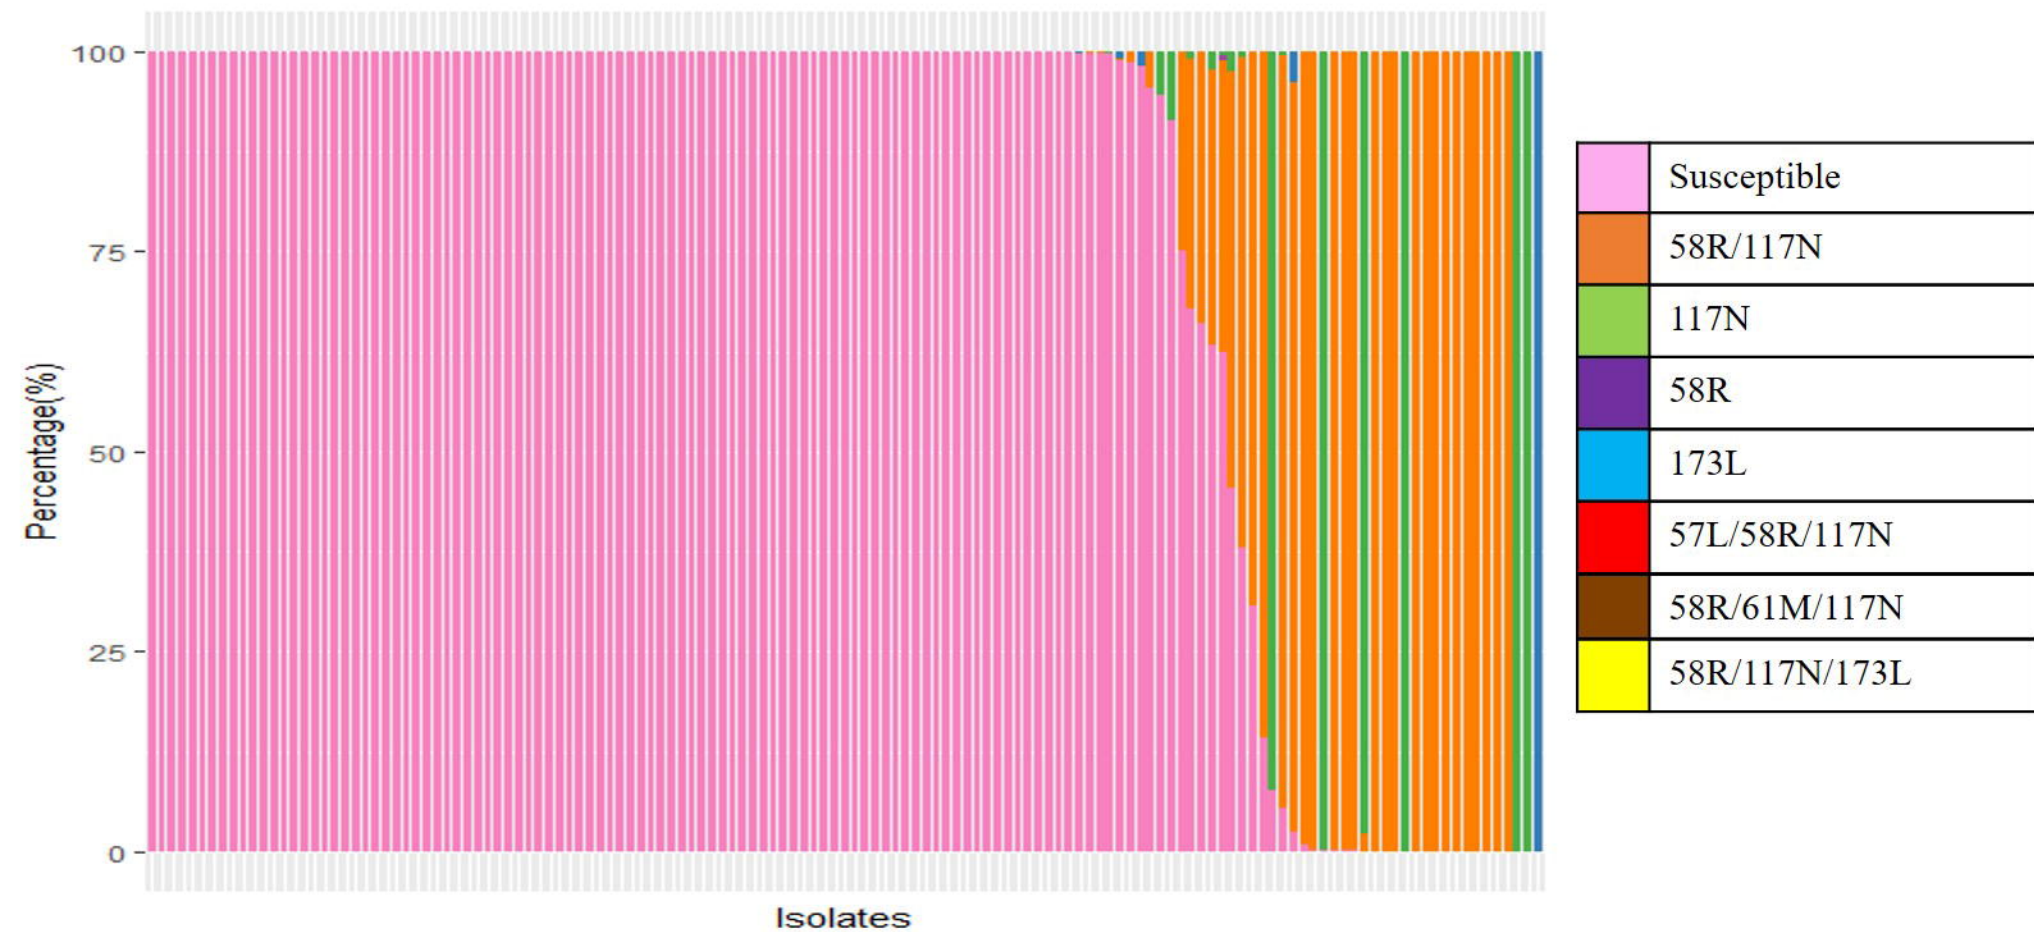

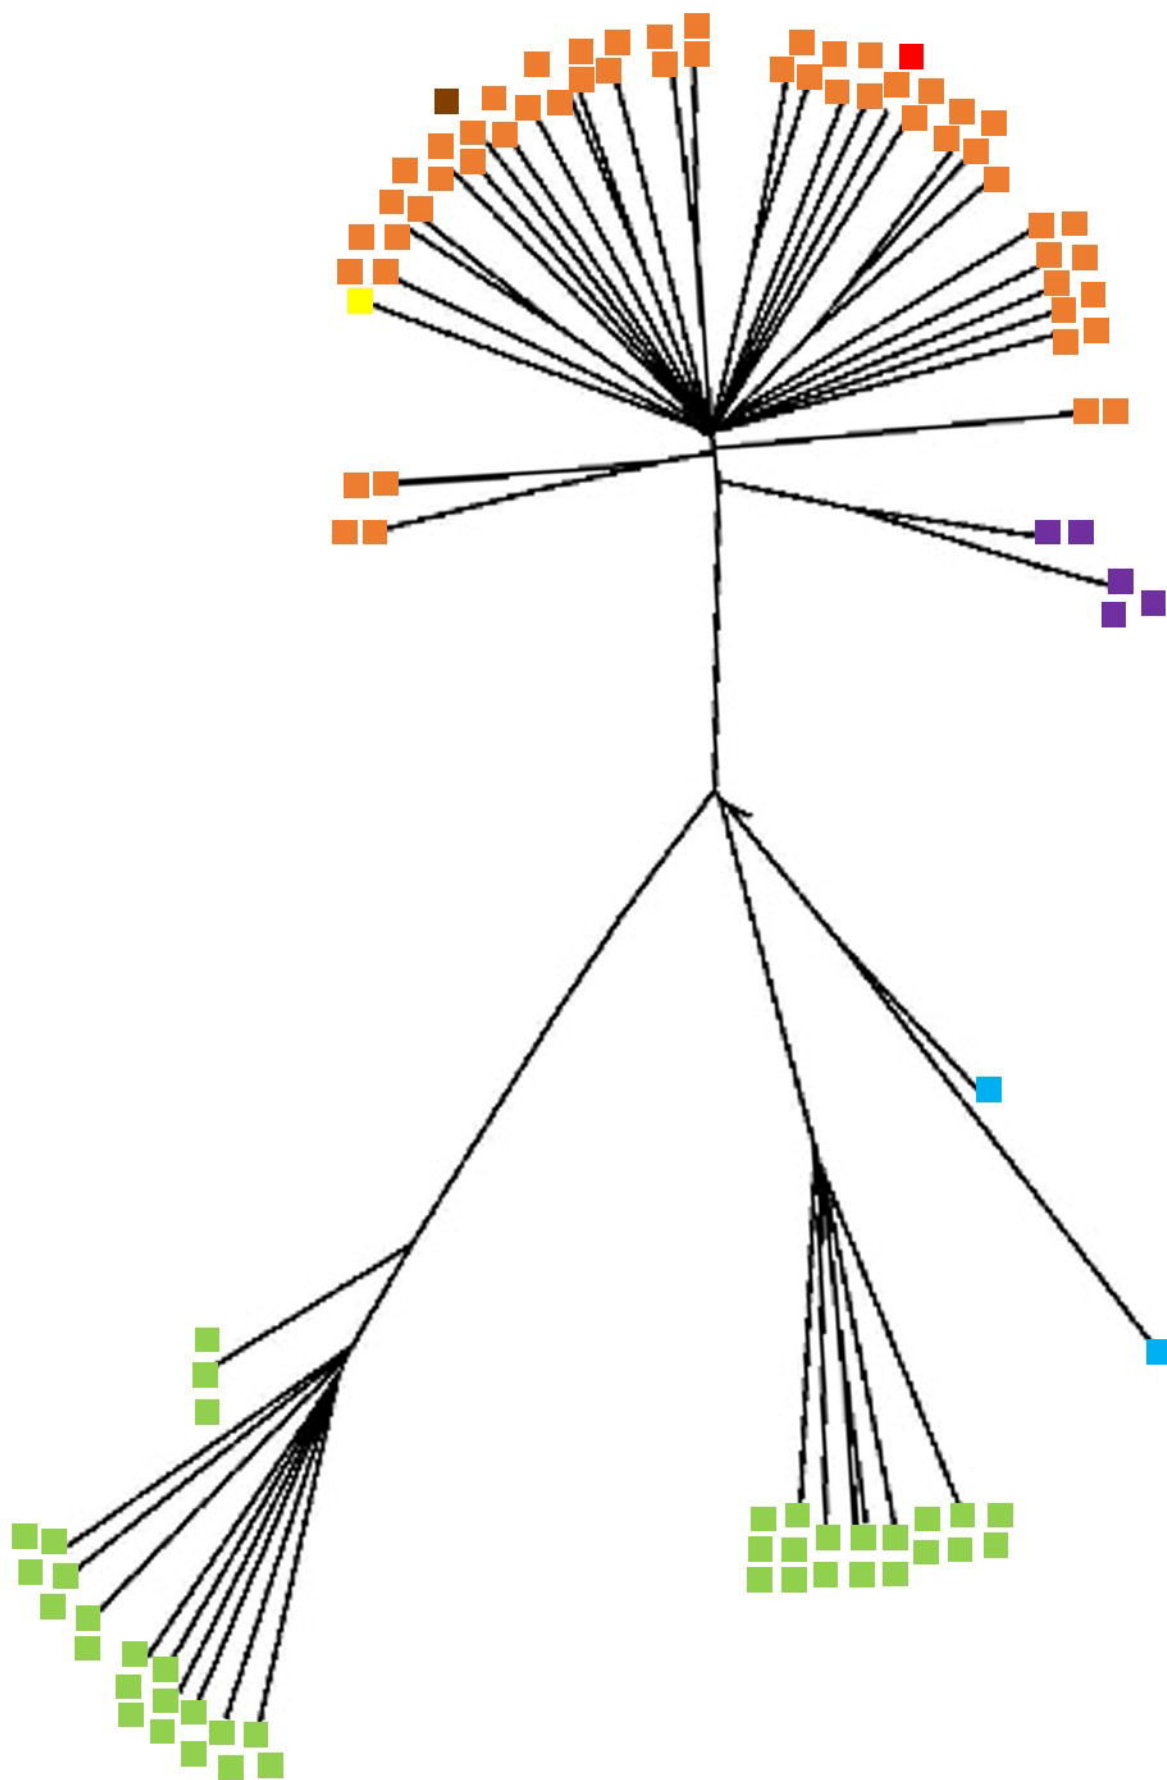

| Number of haplotypes |               |    |
|----------------------|---------------|----|
|                      | 58R/117N      | 54 |
|                      | 117N          | 40 |
|                      | 58R           | 5  |
|                      | 173L          | 2  |
|                      | 57L/58R/117N  | 1  |
|                      | 58R/61M/117N  | 1  |
|                      | 58R/117N/173L | 1  |



**Table 1.** Relative allele frequencies of the *dhfr* pyrimethamine resistance-associated mutations in 42 *P. vivax* isolates showing resistance reads, from the Punjab province of Pakistan. The relative allele frequency of resistance versus susceptible was based on the alleles identification using Illumina MiSeq deep amplicon sequencing technology.

| Isolates ID | Total no. of Illumina Miseq reads | Total no of susceptible reads | Total no of resistant reads | Susceptible alleles | 58R/117N resistant alleles | 58R resistant alleles | 117N resistant alleles | 173L resistant alleles | 57L//S58R/117N resistant alleles | 58R/61M/117N resistant alleles | 58R/117N/173L resistant alleles | Region         |
|-------------|-----------------------------------|-------------------------------|-----------------------------|---------------------|----------------------------|-----------------------|------------------------|------------------------|----------------------------------|--------------------------------|---------------------------------|----------------|
| R-1-34      | 3528                              | 3095                          | 433                         | 98.95               | 0.06                       |                       |                        | 0.99                   |                                  |                                |                                 | Lahore         |
| R-2-32      | 1402                              | 1179                          | 223                         | 98.09               |                            |                       |                        | 1.91                   |                                  |                                |                                 | Lahore         |
| R-3-139     | 2092                              | 1767                          | 325                         | 98.60               | 1.40                       |                       |                        |                        |                                  |                                |                                 | Lahore         |
| R-4-141     | 3148                              | 2384                          | 764                         | 95.45               | 4.55                       |                       |                        |                        |                                  |                                |                                 | Lahore         |
| R-5-10      | 1880                              | 1548                          | 332                         | 94.48               |                            |                       | 5.52                   |                        |                                  |                                |                                 | D.G. Khan      |
| R-6-45      | 9265                              | 7383                          | 1882                        | 91.41               |                            |                       | 8.59                   |                        |                                  |                                |                                 | Larkana        |
| R-7-92      | 3084                              | 2423                          | 661                         | 75.00               | 25.00                      |                       |                        |                        |                                  |                                |                                 | Faisalabad     |
| R-8-84      | 3542                              | 2406                          | 1136                        | 67.93               | 31.17                      |                       | 0.90                   |                        |                                  |                                |                                 | D.G.Khan       |
| R-9-27      | 5615                              | 4576                          | 1039                        | 66.09               | 33.91                      |                       |                        |                        |                                  |                                |                                 | D.G.Khan       |
| R-10-104    | 8296                              | 6766                          | 1530                        | 63.27               | 34.39                      | 0.06                  | 2.27                   |                        |                                  |                                |                                 | Lahore         |
| R-11-105    | 9325                              | 7120                          | 2205                        | 62.44               | 36.35                      | 0.74                  | 0.47                   |                        |                                  |                                |                                 | Lahore         |
| R-12-26     | 6657                              | 3025                          | 3632                        | 45.44               | 51.98                      | 0.12                  | 2.46                   |                        |                                  |                                |                                 | Lahore         |
| R-13-128    | 8729                              | 2508                          | 6221                        | 37.97               | 61.30                      |                       | 0.73                   |                        |                                  |                                |                                 | Lahore         |
| R-14-102    | 2192                              | 533                           | 1659                        | 30.64               | 69.31                      |                       | 0.04                   |                        |                                  |                                |                                 | Sheikhupura    |
| R-15-109    | 7647                              | 1211                          | 6436                        | 14.29               | 85.71                      |                       |                        |                        |                                  |                                |                                 | D.G.Khan       |
| R-16-55     | 5128                              | 792                           | 4336                        | 7.59                |                            |                       | 92.41                  |                        |                                  |                                |                                 | Lahore         |
| R-17-33     | 6993                              | 566                           | 6427                        | 5.39                | 94.10                      |                       | 0.52                   |                        |                                  |                                |                                 | D.G.Khan       |
| R-18-39     | 2656                              | 234                           | 2422                        | 2.34                | 93.89                      |                       |                        | 3.78                   |                                  |                                |                                 | Lahore         |
| R-19-126    | 3362                              |                               | 3362                        |                     | 99.07                      |                       | 0.10                   |                        |                                  |                                |                                 | Rahem Yar Khan |
| R-20-83     | 3608                              |                               | 3608                        |                     | 99.70                      |                       | 0.03                   |                        |                                  |                                |                                 | Lahore         |
| R-21-14     | 9040                              |                               | 9040                        | 0.2                 |                            |                       | 100                    |                        |                                  |                                |                                 | Layyah         |
| R-22-121    | 7658                              |                               | 7658                        |                     | 99.80                      |                       | 0.03                   |                        |                                  |                                |                                 | D.G.Khan       |
| R-23-82     | 4625                              |                               | 4625                        |                     | 99.78                      |                       | 0.01                   |                        | 0.06                             |                                |                                 | Lahore         |
| R-24-78     | 3847                              |                               | 3847                        |                     | 99.89                      |                       |                        |                        |                                  |                                |                                 | Lahore         |
| R-25-118    | 6697                              |                               | 6697                        |                     | 2.12                       |                       | 97.82                  |                        |                                  |                                |                                 | Lahore         |
| R-26-63     | 5657                              |                               | 5657                        |                     | 99.93                      |                       |                        |                        | 0.02                             |                                |                                 | Lahore         |
| R-27-132    | 4900                              |                               | 4900                        |                     | 99.93                      |                       | 0.03                   |                        |                                  |                                |                                 | Lahore         |
| R-28-93     | 2889                              |                               | 2889                        |                     | 99.95                      |                       | 0.03                   |                        |                                  |                                |                                 | Lahore         |
| R-29-97     | 3212                              |                               | 3212                        |                     |                            |                       | 100                    |                        |                                  |                                |                                 | Sheikhupura    |
| R-30-130    | 9325                              |                               | 9325                        |                     | 99.98                      |                       | 0.02                   |                        |                                  |                                |                                 | Lahore         |
| R-31-101    | 8495                              |                               | 8495                        |                     | 99.97                      |                       |                        |                        | 0.01                             | 0.01                           | 0.01                            | Peshawar       |
| R-32-88     | 4333                              |                               | 4333                        |                     | 99.98                      |                       |                        |                        | 0.02                             |                                |                                 | Lahore         |
| R-33-17     | 7447                              |                               | 7447                        |                     | 99.99                      |                       | 0.01                   |                        |                                  |                                |                                 | Lahore         |
| R-34-142    | 3219                              |                               | 3219                        |                     | 100                        |                       |                        |                        |                                  |                                |                                 | Lahore         |
| R-35-112    | 7342                              |                               | 7342                        |                     | 100                        |                       |                        |                        |                                  |                                |                                 | Larkana        |
| R-36-7      | 2412                              |                               | 2412                        |                     | 100                        |                       |                        |                        |                                  |                                |                                 | Gujranwala     |
| R-37-37     | 2115                              |                               | 2115                        |                     | 100                        |                       |                        |                        |                                  |                                |                                 | Lahore         |
| R-38-51     | 3110                              |                               | 3110                        |                     | 100                        |                       |                        |                        |                                  |                                |                                 | Lahore         |
| R-39-64     | 1869                              |                               | 1869                        |                     | 100                        |                       |                        |                        |                                  |                                |                                 | Lahore         |
| R-40-53     | 4836                              |                               | 4836                        |                     |                            |                       | 100                    |                        |                                  |                                |                                 | Lahore         |
| R-41-131    | 3278                              |                               | 3278                        |                     |                            |                       | 100                    |                        |                                  |                                |                                 | Lahore         |
| R-42-28     | 2831                              |                               | 2831                        |                     |                            |                       |                        | 100                    |                                  |                                |                                 | Sheikhupura    |

bioRxiv preprint doi: <https://doi.org/10.1101/2020.09.18.303686>; this version posted September 18, 2020. The copyright holder for this preprint (which was not certified by peer review) is the author/funder. All rights reserved. No reuse allowed without permission.



**Table 2:** Summary of the genetic diversity data for the *dhps* locus of 42 *P. vivax* isolates.

| Isolates ID | (H <sub>d</sub> ) | (S) | (π)     | (Θ <sub>s</sub> ) | (k)   |
|-------------|-------------------|-----|---------|-------------------|-------|
| R-1-34      | 0.111             | 1   | 0.00025 | 0.00066           | 0.121 |
| R-2-32      | 0.294             | 1   | 0.00066 | 0.00065           | 0.294 |
| R-3-139     | 0.659             | 3   | 0.00258 | 0.00213           | 1.143 |
| R-4-141     | 0.682             | 4   | 0.00428 | 0.00297           | 1.909 |
| R-5-10      | 0.173             | 1   | 0.00042 | 0.00067           | 0.173 |
| R-6-45      | 0.390             | 5   | 0.00110 | 0.00282           | 0.468 |
| R-7-92      | 0.538             | 2   | 0.00242 | 0.00141           | 1.077 |
| R-8-84      | 0.600             | 3   | 0.00320 | 0.00216           | 1.371 |
| R-9-27      | 0.500             | 2   | 0.00224 | 0.00016           | 1.000 |
| R-10-104    | 0.439             | 4   | 0.00197 | 0.00202           | 0.767 |
| R-11-105    | 0.753             | 5   | 0.00287 | 0.00288           | 1.150 |
| R-12-26     | 0.788             | 4   | 0.00380 | 0.00297           | 1.697 |
| R-13-128    | 0.800             | 5   | 0.00456 | 0.00338           | 2.033 |
| R-14-102    | 0.857             | 6   | 0.00440 | 0.00389           | 1.886 |
| R-15-109    | 0.545             | 2   | 0.00255 | 0.00155           | 1.091 |
| R-16-55     | 0.882             | 4   | 0.00369 | 0.00317           | 1.644 |
| R-17-33     | 0.818             | 5   | 0.00371 | 0.00371           | 2.318 |
| R-18-39     | 0.729             | 6   | 0.00598 | 0.00388           | 2.571 |
| R-19-126    | 0.383             | 3   | 0.00141 | 0.00183           | 0.625 |
| R-20-83     | 0.228             | 2   | 0.00076 | 0.00133           | 0.338 |
| R-21-14     | 0.471             | 1   | 0.00108 | 0.00167           | 0.471 |
| R-22-121    | 0.775             | 17  | 0.00388 | 0.00188           | 1.664 |
| R-23-82     | 0.288             | 4   | 0.00096 | 0.00224           | 0.425 |
| R-24-78     | 0.200             | 2   | 0.00090 | 0.00159           | 0.400 |
| R-25-118    | 0.754             | 5   | 0.00378 | 0.00312           | 1.623 |
| R-26-63     | 0.145             | 3   | 0.00050 | 0.00175           | 0.222 |
| R-27-132    | 0.251             | 4   | 0.00088 | 0.00229           | 0.386 |
| R-28- 93    | 0.923             | 11  | 0.00496 | 0.00804           | 2.132 |
| R-29-97     | 0.451             | 10  | 0.00131 | 0.00521           | 0.546 |
| R-30-130    | 0.243             | 6   | 0.00073 | 0.00335           | 0.308 |
| R-31-101    | 0.539             | 16  | 0.00162 | 0.00754           | 0.681 |
| R-32-88     | 0.143             | 1   | 0.00033 | 0.00073           | 0.143 |
| R-33-17     | 0.541             | 3   | 0.00141 | 0.00196           | 0.637 |
| R-34-142    |                   |     | N/A     |                   |       |
| R-35-112    | 0.868             | 7   | 0.00278 | 0.00494           | 1.242 |
| R-36-7      |                   |     | N/A     |                   |       |
| R-37-37     |                   |     | N/A     |                   |       |
| R-38-51     | 0.195             | 1   | 0.00021 | 0.00063           | 0.095 |
| R-39-64     |                   |     | N/A     |                   |       |
| R-40-53     | 0.121             | 1   | 0.00065 | 0.00025           | 0.098 |
| R-41-131    | 0.172             | 5   | 0.00050 | 0.00258           | 0.222 |
| R-42-28     |                   |     | N/A     |                   |       |
| Total       | 0.769             | 38  | 0.00415 | 0.01385           | 1.523 |

Haplotype diversity (H<sub>e</sub>); the number of segregating sites (S); nucleotide diversity (π); the mean number of pairwise differences (k); the mutation parameter based on an infinite site equilibrium model, and the mutations parameter based on segregating sites (S<sub>0</sub>).
